# Supplementary material for: Measurement Report: Atmospheric aging of combustion-derived particles: impact on stable free radical concentration and its ability to produce reactive oxygen species in aqueous media
Source: Copernicus journal article supplement (doi:10.5194/egusphere-2023-4), 2023-01-30
Supplement: Supplementary file [file egusphere-2023-4-AC3-supplement.pdf]

This manuscript investigated the impacts of atmospheric aging of combustion-derived particles on the EPFRs concentration and its ability to produce ROS in aqueous media. This issue and findings are significant, the experimental design and measurements are also ingenious. Some comments of improvements are suggested for considering as follows:

General comments:

We thank the Reviewer for the kind comments.

Revisions are needed to present results and support discussions appropriately. There are three main points worthy to notice.

1. The conclusion and significance of this study should be carefully summed up. For examples:

Thank you for the comment. To better summarize, the manuscript has been modified as noted below.

First, the author emphasized the importance of soot in PM<sub>2.5</sub> (Line 41), but there was no particle size analysis for samples in this study.

Response:

The Reviewer is correct that particle size was not addressed here. This was a preliminary study to measure impacts of sunlight on EPFR concentrations and composition in bulk soot. However, in conditions similar to ours (heptane instead of hexane), the particle size of soot is generally in the ultrafine (< 100 nm) range (Xiong et al., 2018). Thus, comparing our results to PM<sub>2.5</sub> is still valid.

Second, the soot generated from hexane in this study as model particle is not the main byproducts of wildfire (Line 245). It's more likely from the fuel combustion, as the hexane is widely used in the fuel and industry.

Response:

We agree that this study more closely resembles fuel exhaust (i.e. internal combustion engine) emissions than forest fires, however, this is a preliminary study to measure impacts of sunlight on EPFR concentrations and composition in bulk soot. Hexane was chosen as a fuel because it is homogenous when compared to biofuel sources, such as those in a wildfire. Future studies should be done that use different fuel sources and explore more variables.

The following has been added to line 256-257 to emphasize this:

*“Future studies should investigate the differences in EPFR characteristics and OH production using multiple fuel sources, including biofuels such as seen in wildfires.”*

Third, the EPFRs in soot from real combustion process was verified to be EPFRs-metal conjugate, which might pose potentially more health effects.

Response:

We agree that the metals-EPFR may complicate and/or exacerbate the health effects of EPFR. In trying to understand each variable for this relatively newly discovered type of pollutant, we have focused on the non-metals in this paper. Our lab has parallel analyses underway where various relevant metals are being added to the fuel, however this study was not focused on EPFR formed from metal-mediated processes, and the health impacts from those is outside the scope of this study.

2. The materials and methods section seems uninformative to readers. Since many techniques have been used in this study, detailed and clearly descriptions of these methods are strongly recommended to support the coming results. For examples:

Line 60: How was the “final soot concentration was 45 ppm (m/v) ” prepared? Any micro-balance used for soot weight quantification should be told?

Response:

Yes, a microbalance was used to mass the soot. To clarify this, lines 61-64 has been modified as follows:

*“Using a microbalance,  $0.0225 \pm 0.0005$  g of soot was combined with 500 mL of MQ water for a ~~The~~ final soot concentration ~~was~~ of  $45 \pm 0.5$  ppm (m/v) for slurries that were used for OH measurements. ~~which~~ This is in line with concentrations of PM<sub>2.5</sub> obtained in previous work (Leresche et al., 2021). ~~and~~ For slurries used for all other analyses  $118 \pm 2$  ppm (m/v) for ~~slurries~~ was used.”*

Line 89: Why this concentration of SBA used in this study? How to determine the concentration of SBA used? Were there any preliminary experiments for supports?

Response: 1 mM SBA was used because it is in great excess of what was expected of the OH radicals produced ( $>1.0 \mu\text{M}$ ). This ensured that SBA was readily available to react with any OH formed during the reactions. This method is discussed in detail in (Runberg and Majestic, 2022)

To clarify this, the line 92-94 of the text has been modified as follows:

*“SBA (1.0 mM) was added to 45 ppm soot slurries just prior to beginning the photoreaction. This concentration was selected to be in substantial excess of the expected OH concentration, allowing the probe to capture the majority of the OH formed during the reaction.”*

Line 90: Why 24 h for soot aged but 16 h for photoreactions here?

In previous studies in our lab (Haynes et al., 2019; Runberg and Majestic, 2022), the photoreaction period for OH formation was 16 hours to mimic the longest amount of sunlight possible near the equator. This was continued with this study to be able to compare the results to the previous study. A 24-hour period for the dry aging was used to maximize measurable differences between photo-aged and dark-aged soot.

3. The results and discussion of OH production and measurement are not solid and convincing. This part should be paid cautious consideration.

Line 181: How were the controls done? It seems that there was no OH produced by soot slurries exposed to light and photo-aged previously. The results could come from SBA photo degradation, not only from the reaction with OH which was produced by soot samples.

Response: Controls of SBA in water (no soot) were done using the same method used for soot slurries, in both lighted and dark reactions, to determine the concentration of p-HBA formed from SBA in water alone. These results are reported in the manuscript (lines 181-182). We are unaware of any pathways for the formation of p-HBA from SBA that do not involve OH, either as a radical or as a hydroxide. Additionally, p-HBA is a synthesis product, not a degradation one.

Line 183-184: “This is consistent with a recent study reporting a decrease in OH concentrations in wildfire smoke plumes downfield from the point source, vs the same plume measured nearer the source (Akherati et al., 2022)”. But soot with dark-aged and then exposed to light can produce higher OH.

Response:

The Reviewer is correct; as the smoke plumes travel away from the point source, they are photoaged, and therefore result in lower concentrations of OH further from the source. Closer to the source, where the smoke has not yet been aged, more OH is produced.

This has been clarified in the text, lines 193-194, as follows:

*“This is consistent with a recent study reporting a decrease in OH concentrations in wildfire smoke plumes downfield from the point source, vs the same plume measured nearer the source (Akherati et al., 2022). This indicates that smoke which has been exposed to sunlight for a longer period of time (i.e. the downfield plume) results in lower concentrations of OH.”*

Line 185-188: That study (Gehling, 2014) measured the OH from dark-aged EPFRs containing-PM suspension, which is different from current study.

Response:

This is an interesting observation. Gehling likely observed this due to the phosphate buffered saline solution used. Lines 197-198 have been added to clarify this.

*“A laboratory study showed reduced ROS activity in aged PM as well (Gehling et al., 2014). In that study, particulate matter was aged at room temperature in phosphate buffered saline solution to maintain a physiologically neutral pH, but no application of light was executed. The authors reported a decrease OH formation of about 11% after one day. This implies that other factors may play a role in the aging of soot, in addition to sunlight.”*

Line 228: “only EPFR on the surface of the particles are available for OH formation”, but the samples were well mixed and stirred in this study.

Response:

Yes, only EPFR on the surface were available for reaction. Even in a well stirred slurry (as in this study), the interior of the particles is not accessible by the water or light. Although well-mixed, note that this is still a suspension and not a solution.

Line 233-234: “The lack of changes to chemical composition of the soot upon irradiation, as seen in the GC-MS and UV-Vis analysis, support the hypothesis that only EPFR on the surface of the particle are available for OH formation”. Doubt. The OH formation in this study seems more affected by the light.

Response:

The Reviewer is correct that the OH formation was strongly affected by light. This supports the fact that this is likely a surface-mediated process, as the light does not penetrate the core of the particle. Additionally, the fact that the overall bulk composition did not change supports that only the surface was affected.

## References

- Haynes, J.P., Miller, K.E., Majestic, B.J., 2019. Investigation into Photoinduced Auto-Oxidation of Polycyclic Aromatic Hydrocarbons Resulting in Brown Carbon Production. *Environmental Science and Technology* 53, 682–691. <https://doi.org/10.1021/acs.est.8b05704>
- Runberg, H.L., Majestic, B.J., 2022. Hydroxyl radical (OH) formation during the photooxidation of anthracene and its oxidized derivatives. *Atmospheric Environment* 286, 119214. <https://doi.org/10.1016/J.ATMOSENV.2022.119214>
- Xiong, G., Boot, M., Zhou, L., Reijnders, J., De Goey, P., 2018. Soot Particle Size Distribution Measurements in Laminar Diffusion Flames of *n*-Heptane with Oxygenated Aromatic Fuel Additives by Time-Resolved Laser-Induced Incandescence. *Energy Fuels* 32, 11511–11518. <https://doi.org/10.1021/acs.energyfuels.8b02012>
